# Supplementary material
Source: PubMed Central journal article supplement (PMC6366859)
Supplement: NIHMS1517375-supplement-1.pdf [file NIHMS1517375-supplement-1.pdf]

Supplemental Table 1 – Krishnan et al.

**A. F2 Adult USVs and F2 Maternal Care Correlations**

| <b>Maternal VEH</b>     |                      | <b>F2 Adult USV</b> |          |            |                |          |       |           |
|-------------------------|----------------------|---------------------|----------|------------|----------------|----------|-------|-----------|
|                         |                      | Total Calls         | FM Calls | Flat Calls | Mean Frequency | Duration | Power | Bandwidth |
| <b>F2 Maternal Care</b> | Time on Nest         | 0.48                | 0.55     | 0.19       | 0.09           | 0.13     | 0.25  | 0.07      |
|                         | Time LG Pups         | 0.00                | -0.13    | 0.24       | -0.17          | 0.08     | -0.10 | -0.18     |
|                         | Total Time Nursing   | 0.50                | 0.55     | 0.24       | 0.08           | 0.07     | 0.19  | 0.03      |
|                         | Time Active Nursing  | 0.50                | 0.41     | 0.51       | 0.05           | -0.36    | -0.13 | -0.20     |
|                         | Time Passive Nursing | 0.39                | 0.52     | 0.01       | 0.08           | 0.33     | 0.36  | 0.17      |

| <b>Maternal PCB</b>     |                      | <b>F2 Adult USV</b> |          |            |                |          |       |           |
|-------------------------|----------------------|---------------------|----------|------------|----------------|----------|-------|-----------|
|                         |                      | Total Calls         | FM Calls | Flat Calls | Mean Frequency | Duration | Power | Bandwidth |
| <b>F2 Maternal Care</b> | Time on Nest         | -0.28               | -0.28    | -0.23      | -0.03          | -0.30    | -0.05 | -0.38     |
|                         | Time LG Pups         | 0.15                | 0.13     | 0.19       | 0.04           | -0.14    | -0.15 | -0.28     |
|                         | Total Time Nursing   | -0.34               | -0.35    | -0.27      | -0.14          | -0.30    | -0.12 | -0.51     |
|                         | Time Active Nursing  | -0.04               | -0.11    | 0.18       | 0.03           | -0.26    | -0.29 | -0.17     |
|                         | Time Passive Nursing | -0.33               | -0.31    | -0.34      | -0.04          | -0.32    | -0.06 | -0.54     |

| <b>Maternal VIN</b>     |                      | <b>F2 Adult USV</b> |          |            |                |          |       |           |
|-------------------------|----------------------|---------------------|----------|------------|----------------|----------|-------|-----------|
|                         |                      | Total Calls         | FM Calls | Flat Calls | Mean Frequency | Duration | Power | Bandwidth |
| <b>F2 Maternal Care</b> | Time on Nest         | 0.28                | 0.15     | 0.47       | 0.11           | 0.21     | 0.36  | -0.50     |
|                         | Time LG Pups         | 0.12                | 0.19     | -0.03      | -0.24          | 0.07     | 0.35  | -0.04     |
|                         | Total Time Nursing   | -0.21               | -0.21    | -0.22      | 0.21           | -0.07    | 0.14  | -0.32     |
|                         | Time Active Nursing  | -0.03               | -0.04    | 0.00       | -0.33          | 0.04     | 0.03  | -0.88     |
|                         | Time Passive Nursing | -0.18               | -0.21    | -0.11      | 0.34           | -0.08    | 0.15  | -0.09     |

| <b>Paternal VEH</b>     |                      | <b>F2 Adult USV</b> |          |            |                |          |       |           |
|-------------------------|----------------------|---------------------|----------|------------|----------------|----------|-------|-----------|
|                         |                      | Total Calls         | FM Calls | Flat Calls | Mean Frequency | Duration | Power | Bandwidth |
| <b>F2 Maternal Care</b> | Time on Nest         | 0.41                | 0.43     | 0.25       | 0.31           | -0.49    | 0.05  | 0.73      |
|                         | Time LG Pups         | -0.12               | -0.24    | 0.12       | -0.19          | -0.06    | -0.26 | -0.14     |
|                         | Total Time Nursing   | 0.51                | 0.46     | 0.50       | 0.10           | -0.40    | -0.37 | -0.01     |
|                         | Time Active Nursing  | 0.08                | 0.00     | 0.22       | -0.39          | -0.30    | -0.63 | -0.40     |
|                         | Time Passive Nursing | 0.56                | 0.57     | 0.40       | 0.52           | -0.22    | 0.16  | 0.38      |

| <b>Paternal PCB</b>     |                      | <b>F2 Adult USV</b> |          |            |                |          |       |           |
|-------------------------|----------------------|---------------------|----------|------------|----------------|----------|-------|-----------|
|                         |                      | Total Calls         | FM Calls | Flat Calls | Mean Frequency | Duration | Power | Bandwidth |
| <b>F2 Maternal Care</b> | Time on Nest         | -0.09               | -0.01    | -0.21      | 0.37           | -0.05    | -0.09 | 0.32      |
|                         | Time LG Pups         | -0.42               | -0.40    | -0.37      | -0.19          | -0.81    | -0.17 | 0.64      |
|                         | Total Time Nursing   | -0.03               | 0.04     | -0.14      | 0.37           | 0.01     | -0.07 | 0.33      |
|                         | Time Active Nursing  | 0.30                | 0.34     | 0.16       | 0.15           | 0.57     | 0.11  | -0.32     |
|                         | Time Passive Nursing | -0.23               | -0.17    | -0.30      | 0.39           | -0.37    | -0.17 | 0.65      |

| <b>Paternal VIN</b>     |                      | <b>F2 Adult USV</b> |          |            |                |          |       |           |
|-------------------------|----------------------|---------------------|----------|------------|----------------|----------|-------|-----------|
|                         |                      | Total Calls         | FM Calls | Flat Calls | Mean Frequency | Duration | Power | Bandwidth |
| <b>F2 Maternal Care</b> | Time on Nest         | 0.40                | 0.50     | 0.01       | 0.38           | 0.47     | 0.76  | 0.05      |
|                         | Time LG Pups         | 0.15                | 0.07     | 0.31       | 0.04           | 0.36     | 0.14  | -0.11     |
|                         | Total Time Nursing   | 0.49                | 0.56     | 0.12       | 0.44           | 0.46     | 0.71  | 0.04      |
|                         | Time Active Nursing  | -0.31               | -0.39    | 0.02       | 0.04           | 0.20     | 0.29  | -0.19     |
|                         | Time Passive Nursing | 0.39                | 0.49     | -0.03      | 0.34           | 0.38     | 0.59  | 0.09      |

\*,  $p < 0.001$  ( $\alpha_{\text{altered}} = 0.05/35$ )

## B. F2 Adult & F3 Pup USVs Correlation

| Maternal VEH |                | F2 Adult USV |          |            |                |          |       |
|--------------|----------------|--------------|----------|------------|----------------|----------|-------|
|              |                | Total Calls  | FM Calls | Flat Calls | Mean Frequency | Duration | Power |
| F3 Pup USV   | Totalcalls     | -0.03        | -0.14    | 0.19       | -0.36          | -0.21    | -0.35 |
|              | FM Calls       | -0.11        | -0.21    | 0.11       | -0.18          | -0.44    | -0.30 |
|              | Flat Calls     | 0.08         | -0.03    | 0.25       | -0.53          | 0.13     | -0.35 |
|              | Mean Frequency | 0.10         | -0.10    | 0.43       | -0.21          | -0.27    | -0.30 |
|              | Duration       | -0.42        | -0.63    | 0.10       | -0.33          | -0.91    | -0.71 |
|              | Power          | -0.23        | -0.35    | 0.06       | -0.60          | -0.57    | -0.67 |

| Maternal PCB |                | F2 Adult USV |          |            |                |          |       |
|--------------|----------------|--------------|----------|------------|----------------|----------|-------|
|              |                | Total Calls  | FM Calls | Flat Calls | Mean Frequency | Duration | Power |
| F3 Pup USV   | Totalcalls     | -0.41        | -0.39    | -0.41      | -0.76          | -0.40    | -0.43 |
|              | FM Calls       | -0.39        | -0.36    | -0.42      | -0.76          | -0.37    | -0.36 |
|              | Flat Calls     | -0.41        | -0.40    | -0.38      | -0.73          | -0.41    | -0.47 |
|              | Mean Frequency | 0.32         | 0.35     | 0.19       | -0.20          | 0.55     | 0.44  |
|              | Duration       | -0.68        | -0.61    | -0.82      | -0.61          | -0.86    | -0.74 |
|              | Power          | -0.35        | -0.36    | -0.28      | 0.00           | -0.45    | -0.47 |

| Maternal VIN |                | F2 Adult USV |          |            |                |          |       |
|--------------|----------------|--------------|----------|------------|----------------|----------|-------|
|              |                | Total Calls  | FM Calls | Flat Calls | Mean Frequency | Duration | Power |
| F3 Pup USV   | Totalcalls     | -0.69        | -0.61    | -0.72      | -0.58          | -0.66    | -0.72 |
|              | FM Calls       | -0.24        | -0.15    | -0.34      | -0.49          | -0.30    | -0.29 |
|              | Flat Calls     | -0.70        | -0.69    | -0.61      | -0.24          | -0.59    | -0.70 |
|              | Mean Frequency | 0.29         | 0.36     | 0.12       | -0.01          | 0.21     | 0.49  |
|              | Duration       | -0.17        | -0.23    | -0.04      | 0.12           | -0.08    | -0.15 |
|              | Power          | 0.30         | 0.21     | 0.39       | -0.79          | 0.10     | 0.00  |

| Paternal VEH |                | F2 Adult USV |          |            |                |          |       |
|--------------|----------------|--------------|----------|------------|----------------|----------|-------|
|              |                | Total Calls  | FM Calls | Flat Calls | Mean Frequency | Duration | Power |
| F3 Pup USV   | Totalcalls     | -0.52        | -0.41    | -0.59      | 0.59           | -0.03    | 0.00  |
|              | FM Calls       | -0.42        | -0.32    | -0.51      | 0.14           | 0.37     | 0.03  |
|              | Flat Calls     | -0.45        | -0.37    | -0.48      | 0.77           | -0.33    | -0.02 |
|              | Mean Frequency | -0.28        | -0.38    | -0.01      | 0.04           | -0.08    | -0.15 |
|              | Duration       | 0.21         | 0.27     | 0.03       | -0.10          | 0.54     | 0.15  |
|              | Power          | -0.38        | -0.33    | -0.38      | 0.14           | 0.19     | -0.14 |

| Paternal PCB |                | F2 Adult USV |          |            |                |          |       |
|--------------|----------------|--------------|----------|------------|----------------|----------|-------|
|              |                | Total Calls  | FM Calls | Flat Calls | Mean Frequency | Duration | Power |
| F3 Pup USV   | Totalcalls     | -0.23        | -0.21    | -0.22      | -0.86          | 0.10     | 0.61  |
|              | FM Calls       | -0.05        | 0.06     | -0.21      | -0.45          | 0.32     | 0.74  |
|              | Flat Calls     | -0.28        | -0.30    | -0.17      | -0.88          | -0.04    | 0.39  |
|              | Mean Frequency | -0.10        | -0.23    | 0.14       | 0.58           | -0.37    | -0.78 |
|              | Duration       | -0.55        | -0.44    | -0.62      | -0.66          | -0.25    | 0.48  |
|              | Power          | 0.03         | 0.07     | -0.05      | -0.61          | 0.28     | 0.68  |

| Paternal VIN |                | F2 Adult USV |          |            |                |          |       |
|--------------|----------------|--------------|----------|------------|----------------|----------|-------|
|              |                | Total Calls  | FM Calls | Flat Calls | Mean Frequency | Duration | Power |
| F3 Pup USV   | Totalcalls     | -0.08        | -0.05    | -0.12      | -0.12          | -0.17    | -0.06 |
|              | FM Calls       | -0.16        | -0.14    | -0.15      | -0.11          | -0.19    | -0.08 |
|              | Flat Calls     | 0.06         | 0.09     | -0.04      | -0.08          | -0.08    | 0.00  |
|              | Mean Frequency | -0.03        | 0.01     | -0.13      | -0.04          | -0.15    | -0.15 |
|              | Duration       | -0.17        | -0.15    | -0.19      | -0.02          | -0.08    | -0.08 |
|              | Power          | -0.07        | -0.03    | -0.14      | -0.03          | 0.09     | 0.05  |

\*,  $p < 0.001$  ( $\alpha_{\text{altered}} = 0.05/36$ )

**C. F2 Maternal Care and F3 Pup USVs by Day**

| <b>P3 Maternal VEH</b> |                | <b>F2 Maternal Care</b> |              |                    |                     |                      |
|------------------------|----------------|-------------------------|--------------|--------------------|---------------------|----------------------|
|                        |                | Time on Nest            | Time LG Pups | Total Time Nursing | Time Active Nursing | Time Passive Nursing |
| <b>F3 Pup USVs</b>     | Total Calls    | -0.70                   | -0.05        | -0.56              | -0.91               | -0.37                |
|                        | FM Calls       | -0.68                   | -0.10        | -0.37              | -0.81               | -0.19                |
|                        | Flat Calls     | -0.59                   | -0.02        | -0.56              | -0.81               | -0.40                |
|                        | Power          | -0.06                   | 0.52         | 0.17               | -0.49               | 0.32                 |
|                        | Mean Frequency | -0.57                   | -0.06        | -0.31              | -0.51               | -0.20                |
|                        | Duration       | -0.10                   | 0.56         | 0.00               | 0.08                | -0.03                |

  

| <b>P3 Maternal PCB</b> |                | <b>F2 Maternal Care</b> |              |                    |                     |                      |
|------------------------|----------------|-------------------------|--------------|--------------------|---------------------|----------------------|
|                        |                | Time on Nest            | Time LG Pups | Total Time Nursing | Time Active Nursing | Time Passive Nursing |
| <b>F3 Pup USVs</b>     | Total Calls    | 0.23                    | 0.25         | 0.08               | 0.13                | 0.24                 |
|                        | FM Calls       | -0.05                   | 0.04         | 0.07               | 0.02                | -0.01                |
|                        | Flat Calls     | 0.29                    | 0.29         | 0.08               | 0.17                | 0.30                 |
|                        | Power          | 0.16                    | 0.08         | -0.82              | -0.34               | 0.01                 |
|                        | Mean Frequency | -0.46                   | -0.66        | 0.15               | 0.41                | -0.42                |
|                        | Duration       | 0.50                    | 0.17         | -0.30              | 0.03                | 0.48                 |

  

| <b>P3 Maternal VIN</b> |                | <b>F2 Maternal Care</b> |              |                    |                     |                      |
|------------------------|----------------|-------------------------|--------------|--------------------|---------------------|----------------------|
|                        |                | Time on Nest            | Time LG Pups | Total Time Nursing | Time Active Nursing | Time Passive Nursing |
| <b>F3 Pup USVs</b>     | Total Calls    | -0.74                   | -0.25        | -0.77              | -0.15               | -0.53                |
|                        | FM Calls       | -0.62                   | -0.33        | -0.57              | -0.52               | -0.35                |
|                        | Flat Calls     | -0.72                   | -0.20        | -0.78              | 0.00                | -0.57                |
|                        | Power          | -0.09                   | -0.77        | -0.56              | -0.13               | -0.23                |
|                        | Mean Frequency | 0.41                    | -0.12        | 0.48               | -0.19               | 0.21                 |
|                        | Duration       | -0.03                   | -0.87        | -0.08              | -0.24               | 0.45                 |

  

| <b>P3 Paternal VEH</b> |                | <b>F2 Maternal Care</b> |              |                    |                     |                      |
|------------------------|----------------|-------------------------|--------------|--------------------|---------------------|----------------------|
|                        |                | Time on Nest            | Time LG Pups | Total Time Nursing | Time Active Nursing | Time Passive Nursing |
| <b>F3 Pup USVs</b>     | Total Calls    | -0.01                   | -0.29        | -0.16              | -0.05               | 0.40                 |
|                        | FM Calls       | -0.10                   | -0.16        | -0.48              | -0.02               | 0.21                 |
|                        | Flat Calls     | 0.00                    | -0.31        | -0.09              | -0.05               | 0.43                 |
|                        | Power          | 0.39                    | 0.17         | 0.40               | 0.87                | 0.24                 |
|                        | Mean Frequency | 0.29                    | 0.02         | 0.44               | 0.03                | -0.24                |
|                        | Duration       | -0.17                   | 0.13         | -0.47              | -0.25               | 0.53                 |

  

| <b>P3 Paternal A1221</b> |                | <b>F2 Maternal Care</b> |              |                    |                     |                      |
|--------------------------|----------------|-------------------------|--------------|--------------------|---------------------|----------------------|
|                          |                | Time on Nest            | Time LG Pups | Total Time Nursing | Time Active Nursing | Time Passive Nursing |
| <b>F3 Pup USVs</b>       | Total Calls    | -0.35                   | 0.65         | -0.38              | -0.39               | -0.04                |
|                          | FM Calls       | -0.47                   | 0.48         | -0.03              | -0.25               | -0.21                |
|                          | Flat Calls     | -0.25                   | 0.68         | -0.53              | -0.43               | 0.06                 |
|                          | Power          | -0.75                   | -0.03        | -0.43              | -0.01               | -0.70                |
|                          | Mean Frequency | -0.47                   | -0.29        | 0.13               | -0.12               | -0.57                |
|                          | Duration       | -0.23                   | 0.58         | -0.28              | -0.20               | -0.03                |

  

| <b>P3 Paternal VIN</b> |                | <b>F2 Maternal Care</b> |              |                    |                     |                      |
|------------------------|----------------|-------------------------|--------------|--------------------|---------------------|----------------------|
|                        |                | Time on Nest            | Time LG Pups | Total Time Nursing | Time Active Nursing | Time Passive Nursing |
| <b>F3 Pup USVs</b>     | Total Calls    | -0.39                   | -0.11        | -0.56              | -0.23               | 0.34                 |
|                        | FM Calls       | -0.46                   | -0.03        | -0.58              | -0.37               | 0.33                 |
|                        | Flat Calls     | -0.35                   | -0.13        | -0.54              | -0.17               | 0.33                 |
|                        | Power          | -0.91                   | -0.03        | -0.84              | -0.31               | 0.07                 |
|                        | Mean Frequency | 0.00                    | -0.18        | -0.07              | 0.04                | -0.26                |
|                        | Duration       | 0.17                    | -0.30        | 0.11               | -0.19               | 0.39                 |

  

| <b>P6 Maternal VEH</b> |             | <b>F2 Maternal Care</b> |              |                    |                     |                      |
|------------------------|-------------|-------------------------|--------------|--------------------|---------------------|----------------------|
|                        |             | Time on Nest            | Time LG Pups | Total Time Nursing | Time Active Nursing | Time Passive Nursing |
|                        | Total Calls | -0.48                   | -0.02        | -0.53              | -0.44               | -0.15                |

|                        |                |       |       |       |       |       |
|------------------------|----------------|-------|-------|-------|-------|-------|
| <b>F3 Pup<br/>USVs</b> | FM Calls       | -0.41 | -0.04 | -0.46 | -0.36 | -0.08 |
|                        | Flat Calls     | -0.57 | 0.00  | -0.61 | -0.55 | -0.27 |
|                        | Power          | 0.27  | -0.21 | 0.24  | 0.02  | -0.10 |
|                        | Mean Frequency | -0.31 | -0.49 | -0.36 | -0.05 | 0.42  |
|                        | Duration       | -0.04 | 0.48  | -0.04 | 0.16  | 0.76  |

| <b>P6 Maternal PCB</b> |                | <b>F2 Maternal Care</b> |              |                    |                     |                      |
|------------------------|----------------|-------------------------|--------------|--------------------|---------------------|----------------------|
|                        |                | Time on Nest            | Time LG Pups | Total Time Nursing | Time Active Nursing | Time Passive Nursing |
| <b>F3 Pup<br/>USVs</b> | Total Calls    | 0.27                    | -0.32        | 0.28               | 0.18                | 0.18                 |
|                        | FM Calls       | 0.29                    | -0.25        | 0.30               | 0.13                | 0.31                 |
|                        | Flat Calls     | 0.23                    | -0.38        | 0.24               | 0.24                | 0.00                 |
|                        | Power          | 0.20                    | 0.11         | 0.23               | 0.07                | 0.60                 |
|                        | Mean Frequency | -0.10                   | 0.52         | -0.10              | -0.53               | 0.41                 |
|                        | Duration       | -0.07                   | -0.15        | -0.07              | -0.31               | 0.04                 |

| <b>P6 Maternal VIN</b> |                | <b>F2 Maternal Care</b> |              |                    |                     |                      |
|------------------------|----------------|-------------------------|--------------|--------------------|---------------------|----------------------|
|                        |                | Time on Nest            | Time LG Pups | Total Time Nursing | Time Active Nursing | Time Passive Nursing |
| <b>F3 Pup<br/>USVs</b> | Total Calls    | -0.49                   | 0.44         | -0.54              | -0.02               | -0.07                |
|                        | FM Calls       | -0.54                   | 0.51         | -0.62              | 0.03                | -0.02                |
|                        | Flat Calls     | -0.41                   | 0.35         | -0.41              | -0.06               | -0.10                |
|                        | Power          | -0.48                   | 0.65         | -0.70              | 0.30                | -0.02                |
|                        | Mean Frequency | 0.31                    | 0.35         | 0.15               | 0.19                | 0.52                 |
|                        | Duration       | -0.30                   | -0.40        | -0.14              | 0.44                | -0.43                |

| <b>P6 Paternal VEH</b> |                | <b>F2 Maternal Care</b> |              |                    |                     |                      |
|------------------------|----------------|-------------------------|--------------|--------------------|---------------------|----------------------|
|                        |                | Time on Nest            | Time LG Pups | Total Time Nursing | Time Active Nursing | Time Passive Nursing |
| <b>F3 Pup<br/>USVs</b> | Total Calls    | -0.03                   | 0.02         | 0.08               | 0.03                | 0.08                 |
|                        | FM Calls       | 0.05                    | -0.32        | 0.15               | -0.07               | 0.25                 |
|                        | Flat Calls     | -0.10                   | 0.27         | 0.02               | 0.11                | -0.06                |
|                        | Power          | 0.09                    | -0.09        | 0.72               | 0.22                | 0.77                 |
|                        | Mean Frequency | -0.26                   | 0.23         | -0.48              | -0.41               | -0.30                |
|                        | Duration       | 0.19                    | -0.33        | 0.54               | 0.61                | 0.22                 |

| <b>P6 Paternal PCB</b> |                | <b>F2 Maternal Care</b> |              |                    |                     |                      |
|------------------------|----------------|-------------------------|--------------|--------------------|---------------------|----------------------|
|                        |                | Time on Nest            | Time LG Pups | Total Time Nursing | Time Active Nursing | Time Passive Nursing |
| <b>F3 Pup<br/>USVs</b> | Total Calls    | -0.17                   | -0.58        | -0.11              | 0.21                | -0.36                |
|                        | FM Calls       | 0.28                    | -0.56        | 0.31               | 0.35                | 0.15                 |
|                        | Flat Calls     | -0.14                   | -0.28        | -0.08              | 0.24                | -0.35                |
|                        | Power          | 0.65                    | 0.29         | 0.69               | 0.58                | 0.54                 |
|                        | Mean Frequency | -0.33                   | -0.24        | -0.31              | -0.12               | -0.37                |
|                        | Duration       | 0.60                    | -0.02        | 0.61               | 0.37                | 0.61                 |

| <b>P6 Paternal VIN</b> |                | <b>F2 Maternal Care</b> |              |                    |                     |                      |
|------------------------|----------------|-------------------------|--------------|--------------------|---------------------|----------------------|
|                        |                | Time on Nest            | Time LG Pups | Total Time Nursing | Time Active Nursing | Time Passive Nursing |
| <b>F3 Pup<br/>USVs</b> | Total Calls    | -0.11                   | 0.10         | -0.26              | 0.37                | -0.40                |
|                        | FM Calls       | -0.26                   | 0.17         | -0.38              | 0.33                | -0.55                |
|                        | Flat Calls     | 0.14                    | 0.12         | 0.01               | 0.46                | -0.16                |
|                        | Power          | -0.07                   | -0.12        | -0.18              | 0.33                | -0.46                |
|                        | Mean Frequency | -0.55                   | -0.36        | -0.53              | 0.02                | -0.45                |
|                        | Duration       | 0.00                    | 0.26         | -0.04              | 0.33                | -0.19                |

\*,  $p < 0.001$  ( $\alpha_{\text{altered}} = 0.05/30$ )

### D. F2 Maternal Care and F3 Anxiety-like Behavior Correlations

| Maternal VEH             |                         | F2 Maternal Care   |              |              |                     |                      |
|--------------------------|-------------------------|--------------------|--------------|--------------|---------------------|----------------------|
|                          |                         | Total Time Nursing | Time On Nest | Time LG Pups | Time Active Nursing | Time Passive Nursing |
| <b>F3 Open Field</b>     | # Line Crossings        | 0.16               | 0.24         | -0.17        | -0.08               | 0.26                 |
|                          | Mean Speed              | 0.01               | 0.10         | -0.11        | -0.18               | 0.10                 |
|                          | Time Immobile           | -0.05              | -0.12        | 0.22         | 0.12                | -0.12                |
|                          | Time Spent in Corners   | -0.07              | -0.22        | -0.11        | 0.10                | -0.14                |
|                          | Time Spent Inside       | -0.03              | 0.08         | -0.23        | -0.29               | 0.11                 |
| <b>F3 Light:Dark Box</b> | # Line Crossings        | -0.08              | -0.10        | -0.18        | -0.45               | 0.11                 |
|                          | Mean Speed              | -0.30              | -0.31        | -0.16        | -0.66               | -0.07                |
|                          | Time Immobile           | 0.20               | 0.14         | 0.27         | 0.24                | 0.14                 |
|                          | Distance Traveled       | -0.30              | -0.31        | -0.16        | -0.65               | -0.07                |
|                          | Time Spent in Light Box | -0.37              | -0.33        | -0.30        | 0.26                | -0.62                |

| Maternal PCB             |                         | F2 Maternal Care   |              |              |                     |                      |
|--------------------------|-------------------------|--------------------|--------------|--------------|---------------------|----------------------|
|                          |                         | Total Time Nursing | Time On Nest | Time LG Pups | Time Active Nursing | Time Passive Nursing |
| <b>F3 Open Field</b>     | # Line Crossings        | -0.60              | -0.58        | -0.58        | -0.06               | -0.56                |
|                          | Mean Speed              | -0.62              | -0.54        | -0.54        | 0.02                | -0.66                |
|                          | Time Immobile           | 0.62               | 0.65         | 0.38         | 0.07                | 0.57                 |
|                          | Time Spent in Corners   | 0.46               | 0.51         | 0.53         | 0.58                | -0.01                |
|                          | Time Spent Inside       | -0.66              | -0.66        | -0.52        | -0.39               | -0.35                |
| <b>F3 Light:Dark Box</b> | # Line Crossings        | -0.50              | -0.52        | -0.65        | -0.45               | -0.15                |
|                          | Mean Speed              | -0.04              | -0.06        | -0.35        | -0.01               | -0.03                |
|                          | Time Immobile           | 0.901*             | 0.9208*      | 0.35         | 0.35                | 0.64                 |
|                          | Distance Traveled       | -0.04              | -0.06        | -0.35        | -0.01               | -0.03                |
|                          | Time Spent in Light Box | -0.46              | -0.46        | -0.08        | -0.36               | -0.18                |

| Maternal VIN             |                         | F2 Maternal Care   |              |              |                     |                      |
|--------------------------|-------------------------|--------------------|--------------|--------------|---------------------|----------------------|
|                          |                         | Total Time Nursing | Time On Nest | Time LG Pups | Time Active Nursing | Time Passive Nursing |
| <b>F3 Open Field</b>     | # Line Crossings        | 0.25               | 0.30         | -0.02        | 0.11                | 0.20                 |
|                          | Mean Speed              | 0.29               | 0.34         | -0.01        | 0.07                | 0.30                 |
|                          | Time Immobile           | -0.18              | -0.18        | 0.20         | -0.04               | -0.18                |
|                          | Time Spent in Corners   | 0.14               | 0.09         | -0.23        | -0.11               | 0.30                 |
|                          | Time Spent Inside       | -0.11              | -0.10        | -0.13        | 0.12                | -0.28                |
| <b>F3 Light:Dark Box</b> | # Line Crossings        | 0.08               | 0.16         | -0.45        | -0.23               | 0.35                 |
|                          | Mean Speed              | 0.24               | 0.28         | -0.56        | -0.09               | 0.41                 |
|                          | Time Immobile           | -0.08              | -0.13        | -0.18        | -0.32               | 0.24                 |
|                          | Distance Traveled       | 0.25               | 0.29         | -0.56        | -0.09               | 0.41                 |
|                          | Time Spent in Light Box | -0.05              | -0.02        | 0.26         | 0.15                | -0.24                |

| Paternal VEH             |                       | F2 Maternal Care   |              |              |                     |                      |
|--------------------------|-----------------------|--------------------|--------------|--------------|---------------------|----------------------|
|                          |                       | Total Time Nursing | Time On Nest | Time LG Pups | Time Active Nursing | Time Passive Nursing |
| <b>F3 Open Field</b>     | # Line Crossings      | -0.14              | -0.05        | -0.48        | -0.68               | 0.44                 |
|                          | Mean Speed            | -0.12              | -0.08        | -0.38        | -0.69               | 0.49                 |
|                          | Time Immobile         | 0.36               | 0.30         | 0.52         | 0.73                | -0.23                |
|                          | Time Spent in Corners | -0.08              | -0.06        | 0.23         | 0.18                | -0.26                |
|                          | Time Spent Inside     | 0.45               | 0.40         | -0.42        | -0.09               | 0.63                 |
| <b>F3 Light:Dark Box</b> | # Line Crossings      | -0.44              | -0.25        | 0.46         | -0.34               | -0.22                |
|                          | Mean Speed            | -0.08              | 0.11         | 0.05         | -0.30               | 0.17                 |
|                          | Time Immobile         | -0.15              | -0.24        | 0.51         | 0.29                | -0.45                |

|  |                         |       |       |       |       |       |
|--|-------------------------|-------|-------|-------|-------|-------|
|  | Distance Traveled       | -0.08 | 0.10  | 0.06  | -0.30 | 0.17  |
|  | Time Spent in Light Box | -0.35 | -0.16 | -0.27 | -0.23 | -0.21 |

| <b>Paternal PCB</b>      |                         | <b>F2 Maternal Care</b> |              |              |                     |                      |
|--------------------------|-------------------------|-------------------------|--------------|--------------|---------------------|----------------------|
|                          |                         | Total Time Nursing      | Time On Nest | Time LG Pups | Time Active Nursing | Time Passive Nursing |
| <b>F3 Open Field</b>     | # Line Crossings        | -0.35                   | -0.23        | -0.05        | -0.46               | 0.14                 |
|                          | Mean Speed              | -0.49                   | -0.36        | -0.02        | -0.53               | 0.06                 |
|                          | Time Immobile           | -0.29                   | -0.26        | 0.17         | -0.13               | -0.20                |
|                          | Time Spent in Corners   | -0.51                   | -0.39        | 0.09         | -0.18               | -0.38                |
|                          | Time Spent Inside       | 0.12                    | -0.04        | -0.14        | 0.16                | -0.05                |
| <b>F3 Light:Dark Box</b> | # Line Crossings        | 0.14                    | 0.02         | 0.06         | -0.22               | 0.44                 |
|                          | Mean Speed              | -0.34                   | -0.32        | -0.38        | -0.26               | -0.10                |
|                          | Time Immobile           | -0.26                   | -0.51        | -0.02        | 0.15                | -0.50                |
|                          | Distance Traveled       | -0.33                   | -0.31        | -0.39        | -0.25               | -0.10                |
|                          | Time Spent in Light Box | 0.12                    | 0.20         | -0.21        | 0.28                | -0.19                |

| <b>Paternal VIN</b>      |                         | <b>F2 Maternal Care</b> |              |              |                     |                      |
|--------------------------|-------------------------|-------------------------|--------------|--------------|---------------------|----------------------|
|                          |                         | Total Time Nursing      | Time On Nest | Time LG Pups | Time Active Nursing | Time Passive Nursing |
| <b>F3 Open Field</b>     | # Line Crossings        | -0.45                   | -0.43        | -0.23        | -0.16               | -0.44                |
|                          | Mean Speed              | -0.69                   | -0.65        | -0.25        | -0.51               | -0.36                |
|                          | Time Immobile           | 0.50                    | 0.48         | 0.19         | 0.26                | 0.40                 |
|                          | Time Spent in Corners   | -0.02                   | 0.03         | 0.17         | -0.41               | 0.47                 |
|                          | Time Spent Inside       | 0.11                    | 0.07         | 0.02         | 0.32                | -0.24                |
| <b>F3 Light:Dark Box</b> | # Line Crossings        | 0.11                    | 0.20         | 0.47         | 0.30                | -0.22                |
|                          | Mean Speed              | -0.13                   | 0.05         | 0.53         | -0.22               | 0.08                 |
|                          | Time Immobile           | 0.33                    | 0.23         | -0.08        | 0.08                | 0.37                 |
|                          | Distance Traveled       | -0.14                   | 0.05         | 0.53         | -0.22               | 0.07                 |
|                          | Time Spent in Light Box | -0.28                   | -0.29        | -0.13        | -0.01               | -0.40                |

\*,  $p < 0.001$  ( $\alpha_{\text{altered}} = 0.05/50$ )

### E. F2 and F3 Serum Hormone Level Correlations by Sex

#### F3 Females

| Maternal VEH |      | F2    |      |
|--------------|------|-------|------|
|              |      | CORT  | E2   |
| F3           | CORT | -0.25 | 0.21 |
|              | E2   | -0.49 | 0.50 |

| Maternal PCB |      | F2    |       |
|--------------|------|-------|-------|
|              |      | CORT  | E2    |
| F3           | CORT | 0.24  | -0.21 |
|              | E2   | -0.08 | 0.34  |

| Maternal VIN |      | F2    |       |
|--------------|------|-------|-------|
|              |      | CORT  | E2    |
| F3           | CORT | -0.07 | 0.38  |
|              | E2   | 0.40  | -0.49 |

| Paternal VEH |      | F2   |         |
|--------------|------|------|---------|
|              |      | CORT | E2      |
| F3           | CORT | 0.26 | 0.03    |
|              | E2   | 0.21 | -0.841* |

| Paternal PCB |      | F2    |       |
|--------------|------|-------|-------|
|              |      | CORT  | E2    |
| F3           | CORT | 0.25  | -0.19 |
|              | E2   | -0.04 | -0.68 |

| Paternal VIN |      | F2   |       |
|--------------|------|------|-------|
|              |      | CORT | E2    |
| F3           | CORT | 0.62 | -0.38 |
|              | E2   | 0.04 | -0.06 |

#### F3 Males

| Maternal VEH |      | F2   |      |
|--------------|------|------|------|
|              |      | CORT | E2   |
| F3           | CORT | 0.31 | 0.07 |
|              | E2   | 0.36 | 0.50 |

| Maternal PCB |      | F2    |       |
|--------------|------|-------|-------|
|              |      | CORT  | E2    |
| F3           | CORT | 0.10  | 0.41  |
|              | E2   | -0.45 | -0.28 |

| Maternal VIN |      | F2   |      |
|--------------|------|------|------|
|              |      | CORT | E2   |
| F3           | CORT | 0.49 | 0.38 |
|              | E2   | 0.04 | 0.05 |

| Paternal VEH |      | F2    |       |
|--------------|------|-------|-------|
|              |      | CORT  | E2    |
| F3           | CORT | 0.20  | -0.45 |
|              | E2   | -0.31 | 0.04  |

| Paternal PCB |      | F2    |      |
|--------------|------|-------|------|
|              |      | CORT  | E2   |
| F3           | CORT | -0.29 | 0.17 |
|              | E2   | -0.66 | 0.54 |

| Paternal VIN |      | F2   |       |
|--------------|------|------|-------|
|              |      | CORT | E2    |
| F3           | CORT | 0.07 | 0.11  |
|              | E2   | 0.30 | -0.43 |

\*,  $p < 0.012$  ( $\alpha_{\text{altered}} = 0.05/4$ )
